# Supplementary material for: Disrupting redox homeostasis for tumor therapy based on PDT/chemo/ferroptosis therapeutic hybrid liposomes
Source: Royal Society of Chemistry journal article supplement (doi:10.1039/d4ra03361b), 2024-01-01
Supplement: d4ra03361b1.pdf [file d4ra03361b1.pdf]

## Breaking the Redox Homeostasis Strategy for Tumor Therapy Based on PDT/Chemo/Ferroptosis Therapeutic Hybrid Liposomes

Yuanping Huang<sup>1,3</sup>, Hongsen Liu<sup>3,4</sup>, Yanfei Zhao<sup>1</sup>, Haoran, Chen<sup>3</sup>, Qiqing Li<sup>3</sup>, Xiaodan Li<sup>1\*</sup>, Shucheng Hua<sup>1\*</sup>, Dianbo Cao<sup>2\*</sup> and Yulei Chang<sup>3</sup>

<sup>1</sup>Department of Respiratory Medicine, the First Hospital of Jilin University, Changchun 130021, China  
Email: ddjy@jlu.edu.cn; Email: hsc@jlu.edu.cn

<sup>2</sup>Department of Radiology, The First Hospital of Jilin University, Changchun 130021, China.  
Email: caodb@jlu.edu.cn

<sup>3</sup> State Key Laboratory of Luminescence and Applications, Changchun Institute of Optics, Fine Mechanics and Physics, Chinese Academy of Sciences, Changchun 130033 Jilin, China.

<sup>4</sup> Stomatology Hospital, School of Stomatology, Zhejiang University School of Medicine, Zhejiang Provincial Clinical Research Center for Oral Diseases, Key Laboratory of Oral Biomedical Research of Zhejiang Province, Cancer Center of Zhejiang University, Engineering Research Center of Oral Biomaterials and Devices of Zhejiang Province, Hangzhou 310000, China

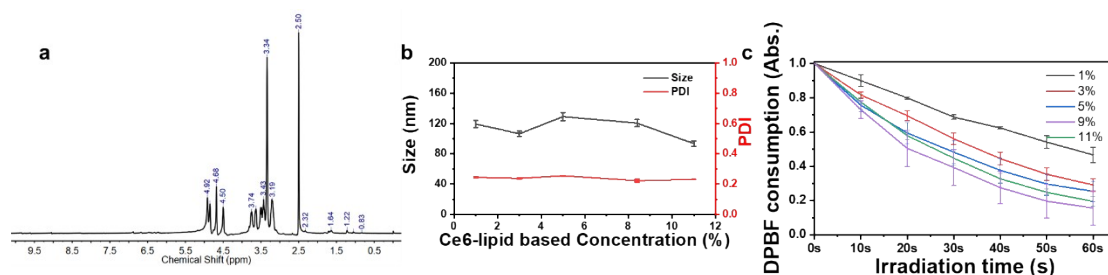

**Figure.S1.** a) <sup>1</sup>H NMR of Lyso-PC-Ce6 molecule. b) DLS size of various Lipo-Ce6 liposomes and c) corresponding singlet oxygen production determined by DPBF consumption.

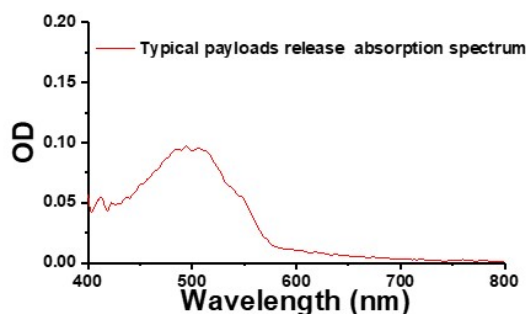

**Figure. S2.** Typical payloads release absorption spectrum.

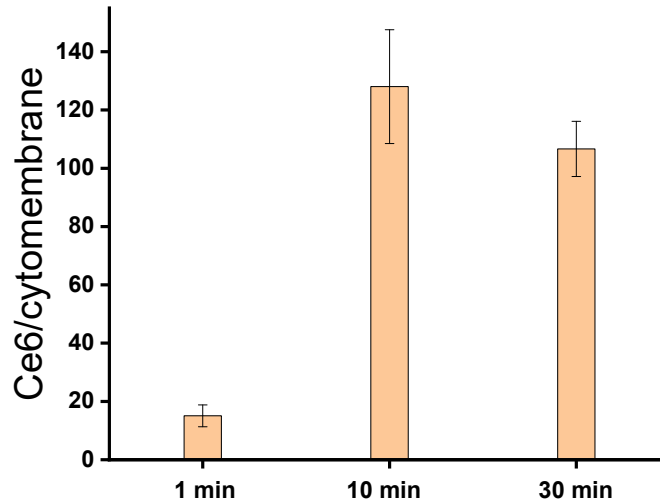

**Figure. S3.** Relative intensity of fluorescence of Ce6 to cytomembrane stained by DiO.

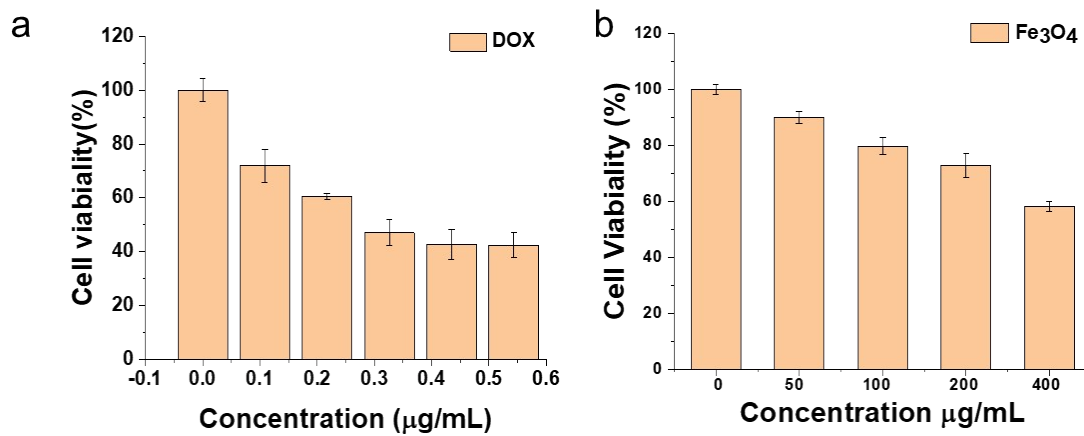

**Figure. S4.** Cell viability of A549 cells after treatment with (a) free DOX and (b) Fe<sub>3</sub>O<sub>4</sub> nanoparticles at various concentrations for 24 h.

**Table 1.**

| Description                              | Gene numbers |
|------------------------------------------|--------------|
| Folate biosynthesis                      | 5            |
| Phenylalanine metabolism                 | 5            |
| cGMP-PKG signaling pathway               | 12           |
| Morphine addiction                       | 7            |
| cAMP signaling pathway                   | 10           |
| Viral carcinogenesis                     | 10           |
| Small cell lung cancer                   | 6            |
| One carbon pool by folate                | 3            |
| Glycine, serine and threonine metabolism | 4            |
| Fatty acid degradation                   | 4            |
| Biosynthesis of amino acids              | 5            |
| O-glycan biosynthesis, mucin type core   | 3            |

|                                                          |                     |
|----------------------------------------------------------|---------------------|
| Neuroactive ligand-receptor interaction                  | 11                  |
| Rap1 signaling pathway                                   | 9                   |
| Sphingolipid signaling pathway                           | 6                   |
| Protein digestion and absorption                         | 5                   |
| Alanine, aspartate and glutamate metabolism              | 3                   |
| Signaling pathways regulating pluripotency of stem cells | 6                   |
| Insulin resistance                                       | 5                   |
| Hedgehog signaling pathway                               | 3                   |
|                                                          |                     |
| <b>Description</b>                                       | <b>Gene numbers</b> |
| Protein processing in endoplasmic reticulum              | 19                  |
| TNF signaling pathway                                    | 14                  |
| Ferroptosis                                              | 9                   |
| Glycine, serine and threonine metabolism                 | 9                   |
| Cysteine biosynthesis, homocysteine + serine => cysteine | 3                   |
| Cytokine-cytokine receptor interaction                   | 19                  |
| Apoptosis                                                | 12                  |
| Amino sugar and nucleotide sugar metabolism              | 7                   |
| NOD-like receptor signaling pathway                      | 13                  |
| NF-kappa B signaling pathway                             | 9                   |
| Salmonella infection                                     | 8                   |
| Transcriptional misregulation in cancer                  | 12                  |
| p53 signaling pathway                                    | 7                   |
| Vibrio cholerae infection                                | 6                   |
| PI3K-Akt signaling pathway                               | 18                  |
| IL-17 signaling pathway                                  | 8                   |
| Pathogenic Escherichia coli infection                    | 6                   |
| Fluid shear stress and atherosclerosis                   | 10                  |
| Bladder cancer                                           | 5                   |
| Epstein-Barr virus infection                             | 12                  |

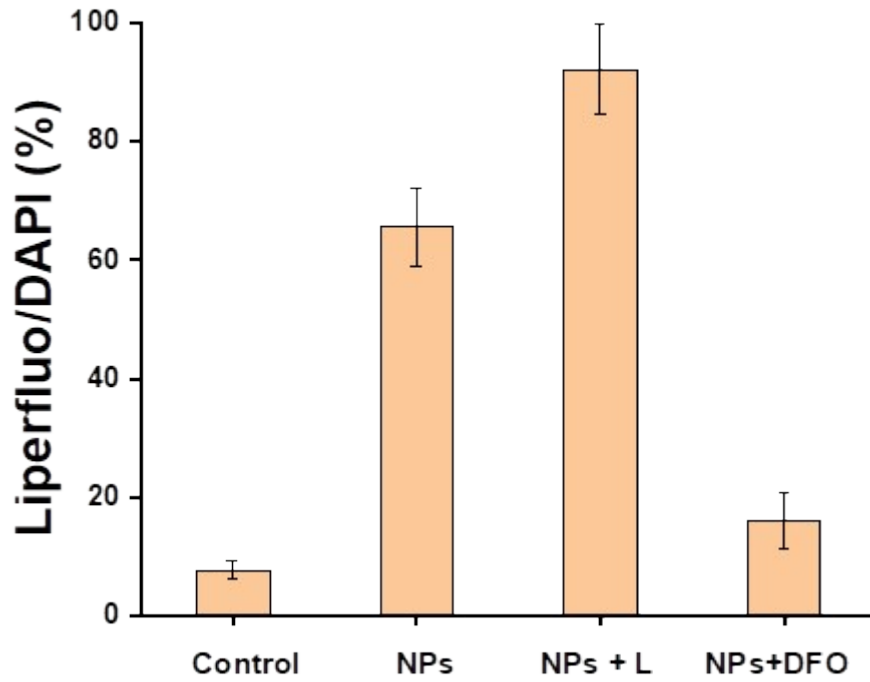

**Figure. S5.** Relative intensity of fluorescence of liperfluo to DAPI.

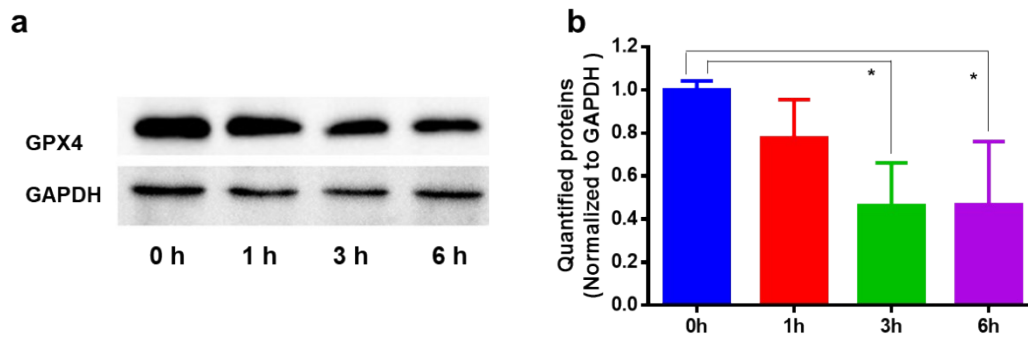

**Figure S6.** a) Western blot analysis and relative expression of GPX4 after treatment with 200  $\mu\text{g}/\text{mL}$  of  $\text{Fe}_3\text{O}_4$  and b) corresponding quantified proteins.  $n=3$ .

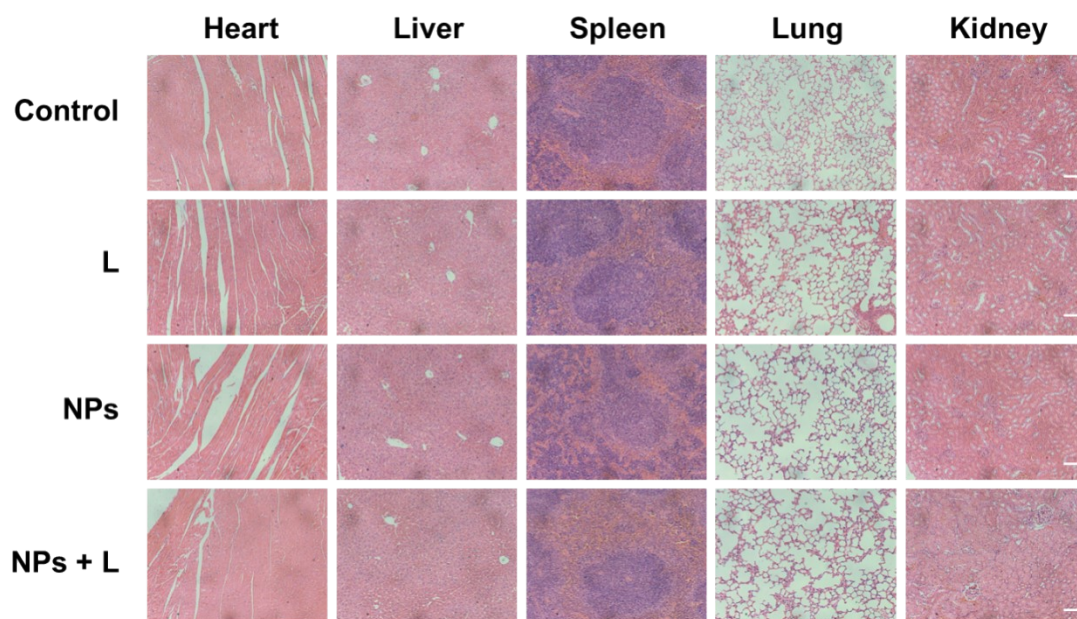

**Figure S7.** H&E stained tissue sections from the heart, liver, spleen, lung, and kidney of the mice after combination therapy(Lipo-Ce6@Fe<sub>3</sub>O<sub>4</sub>-DOX (NPs) and Lipo-Ce6@Fe<sub>3</sub>O<sub>4</sub>-DOX+Light (NPs+L)), PBS and Light (L) radiation at 650 nm as the controls. Scale bar: 100  $\mu$ m.
