# Supplementary figures and images for: Disrupting redox homeostasis for tumor therapy based on PDT/chemo/ferroptosis therapeutic hybrid liposomes
Source: Royal Society of Chemistry journal article supplement (doi:10.1039/d4ra03361b), 2024-01-01

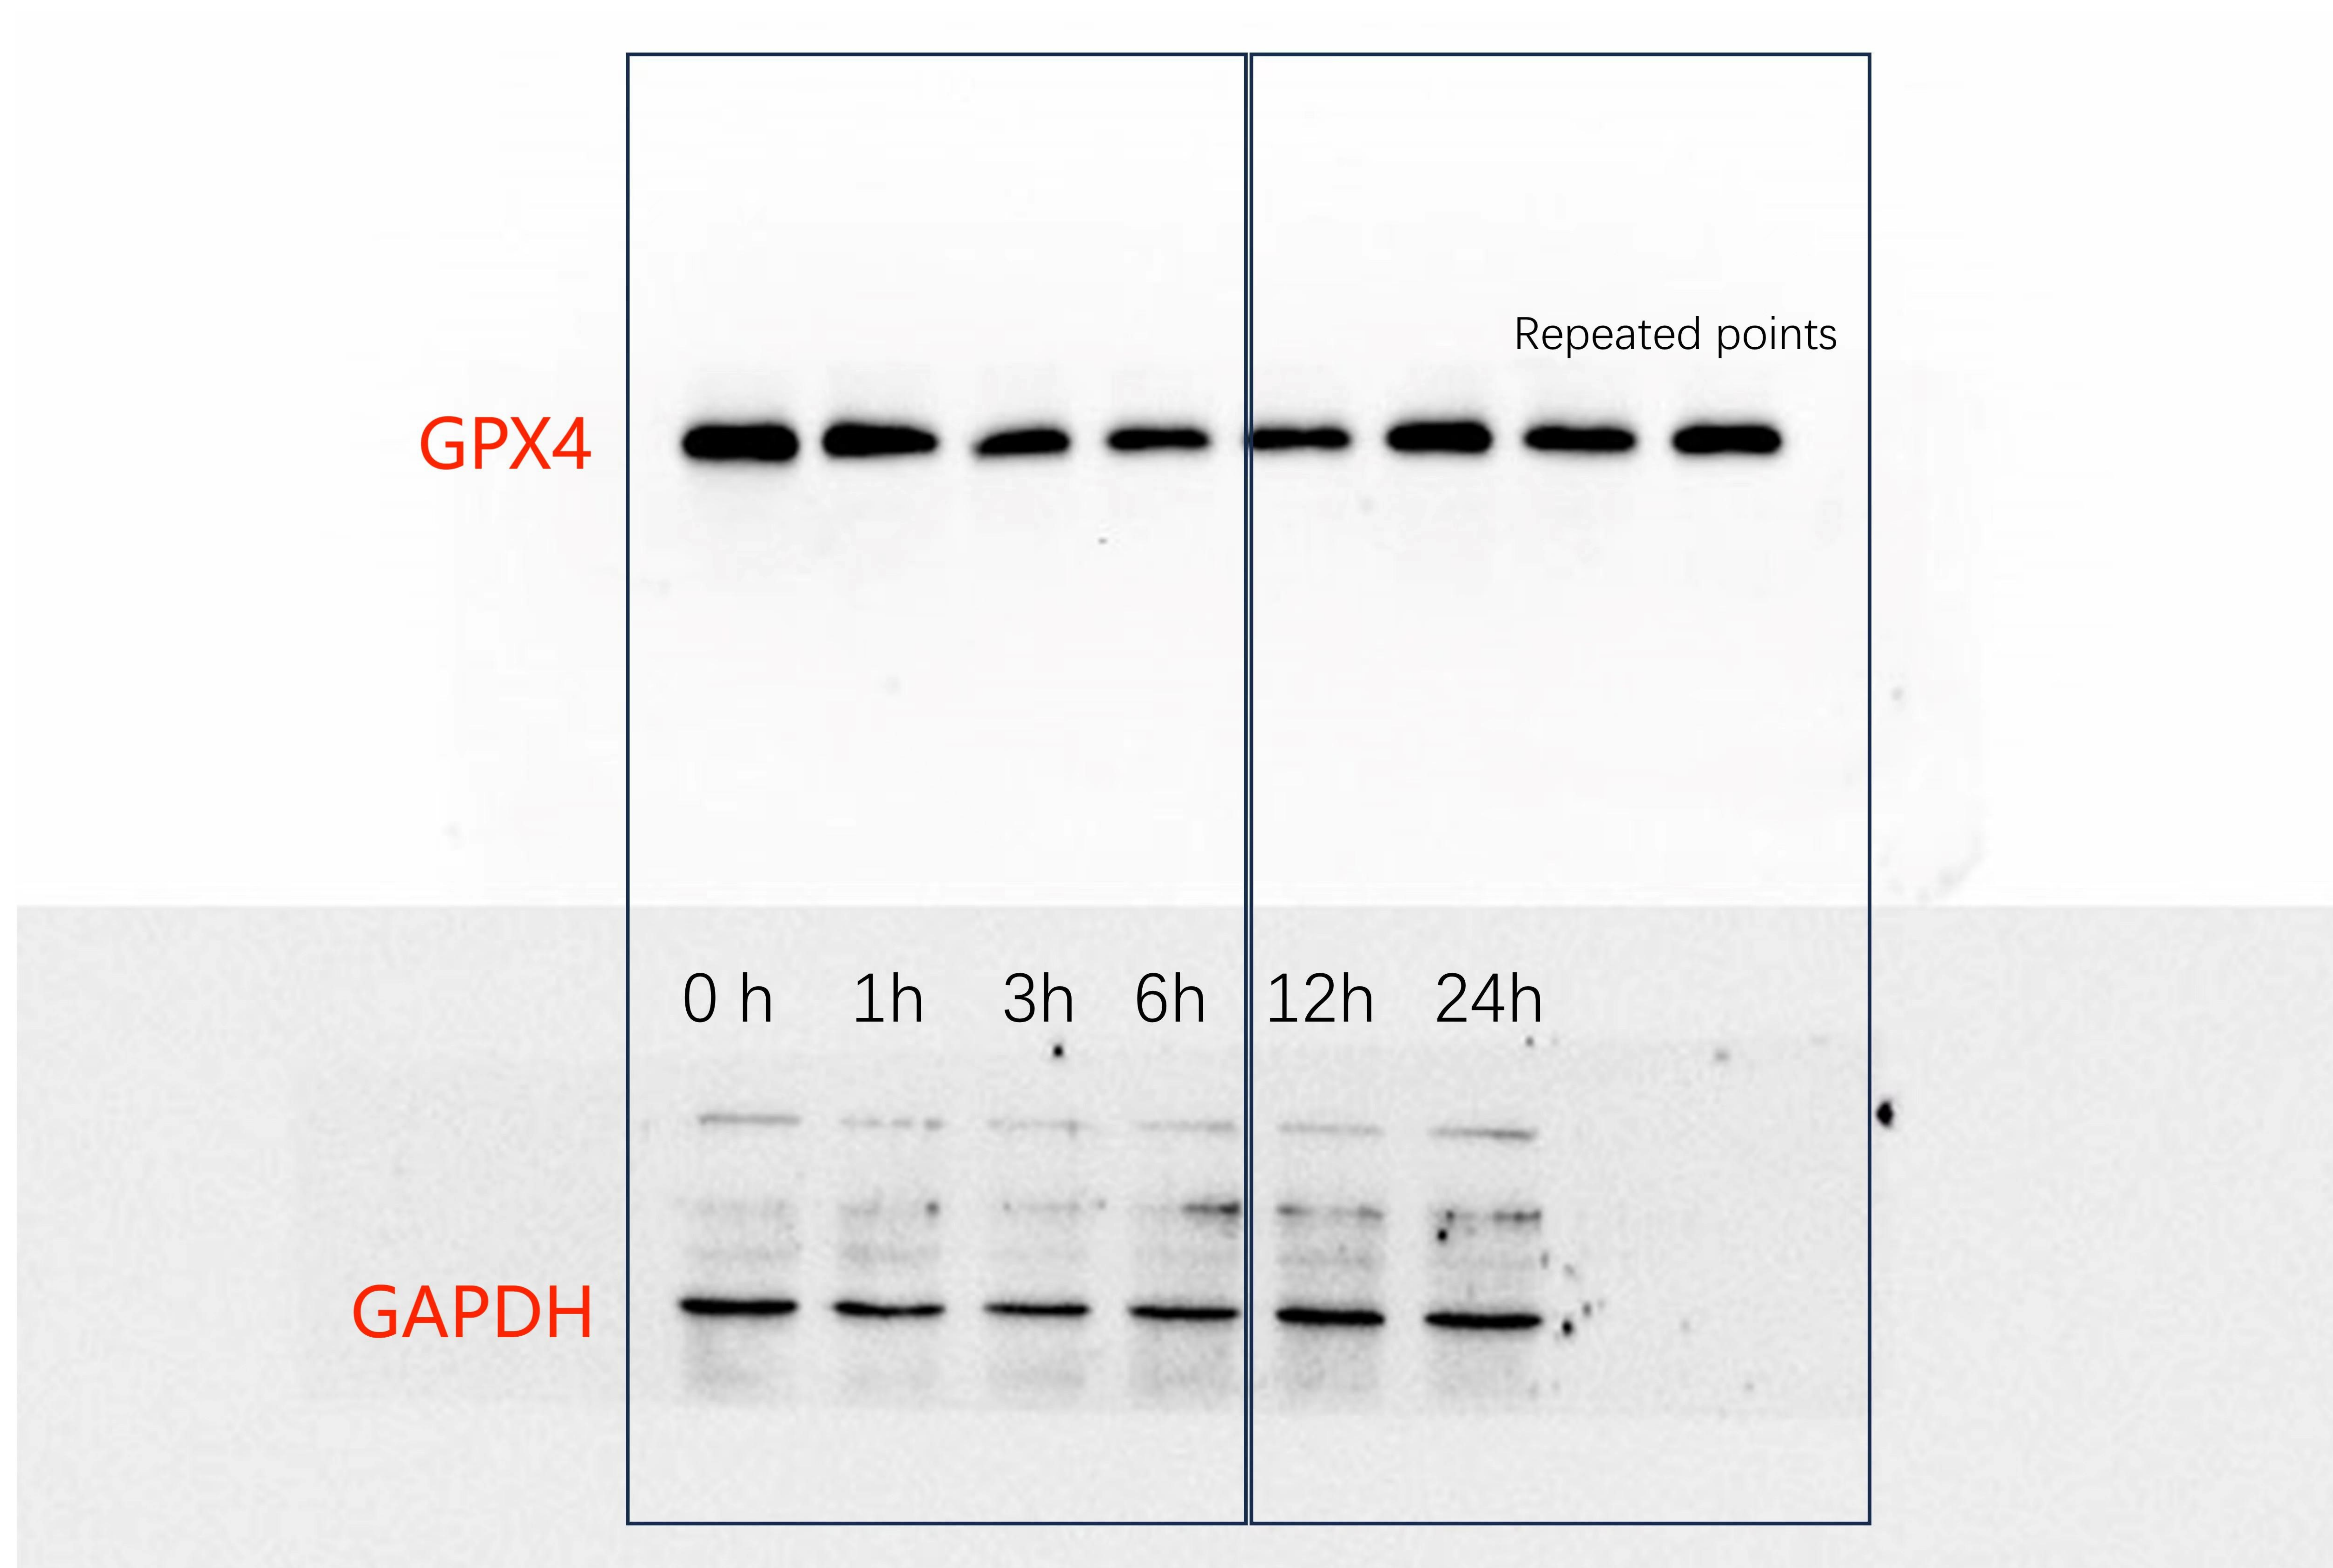

Supplement: d4ra03361b2.pdf [file d4ra03361b2.pdf]

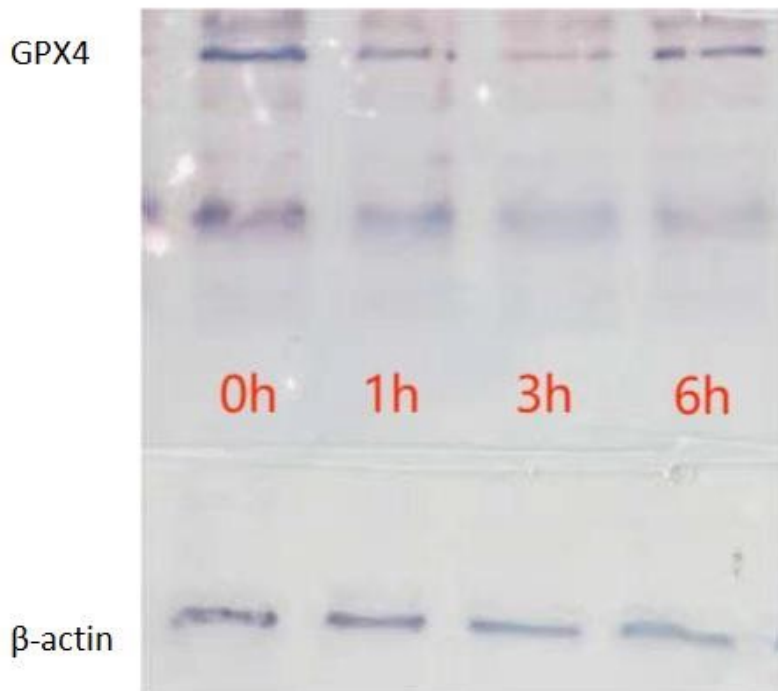

Supplement: d4ra03361b3.pdf [file d4ra03361b3.pdf]
